# Supplementary material
Source: PubMed Central journal article supplement (PMC3900866)

## Web Figure Legend

Web Figure 1. Relationships between BMI, age, biomarkers for men and women, adjusted for age. Plots on the left show results for men; plots on the right for women. The first row (plots A and B) show the BMI-CRP relationships for men and women; the second row (plots C and D) show the BMI-HbA1c relationships for men and women; the third row (plots E and F) show the BMI-HDL relationships for men and women. The vertical axes show the level of each biomarker outcome; the horizontal axes show BMI and age. The height of the surface above the horizontal plane represents the level of a biomarker for each BMI/age combination.

BMI=Body mass index, CRP=C-reactive protein, HbA1c=glycated hemoglobin, HDL=high-density lipoprotein cholesterol.

A)

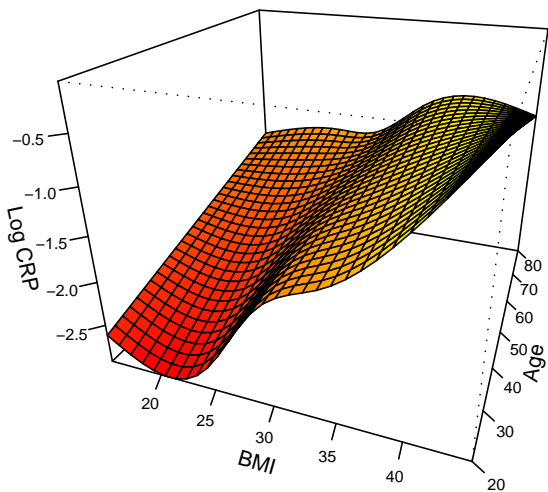

B)

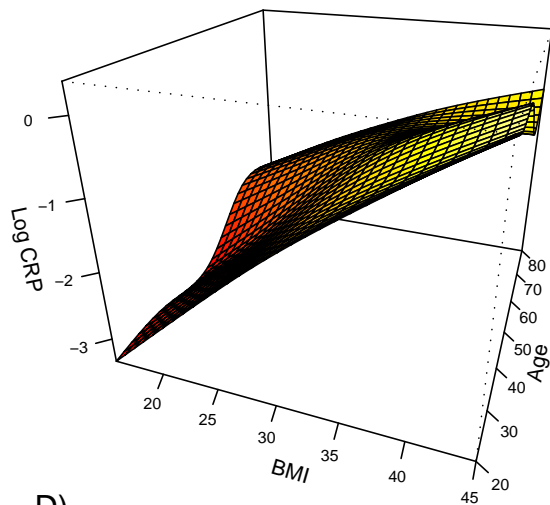

C)

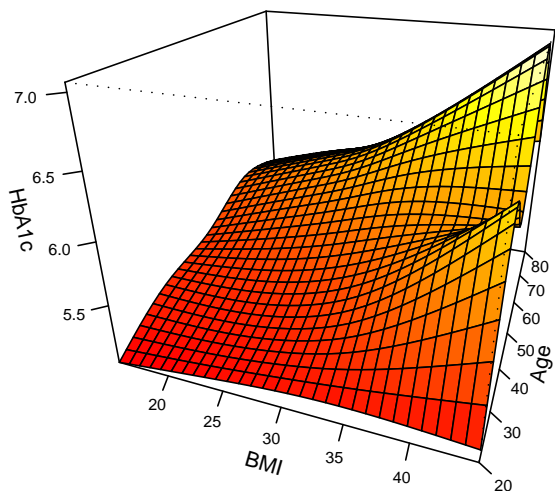

D)

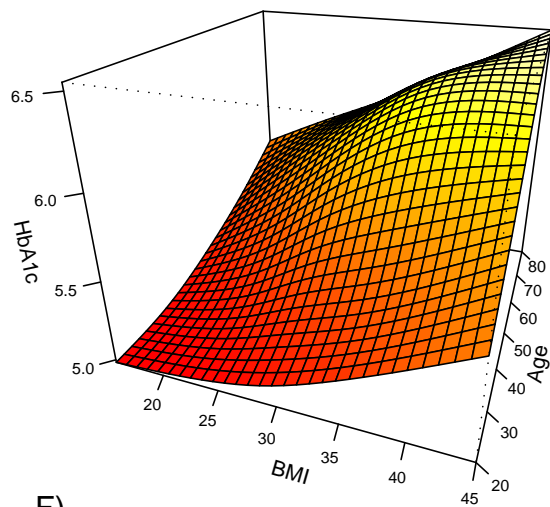

E)

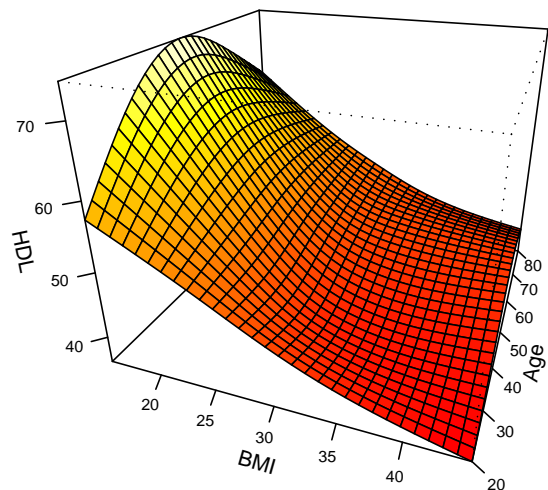

F)

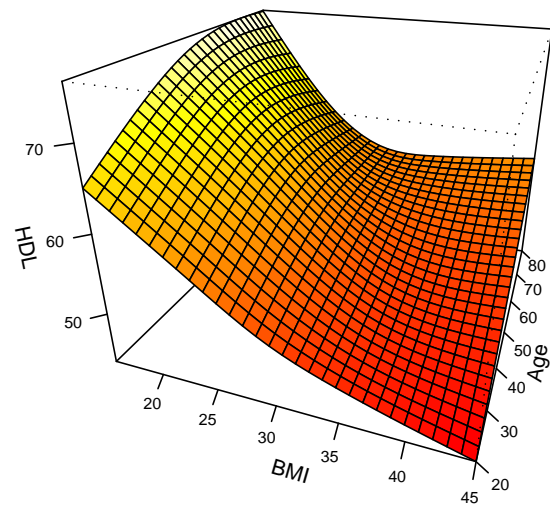

Supplement: supp_kwq382_kwq382_Web_Figure_Legend.pdf [file supp_kwq382_kwq382_Web_Figure_Legend.pdf]
